# Supplementary material for: Short and Long-Term Effects of Early and Late Weaning on Atlantic Cod, Gadus morhua
Source: MDPI journal article supplement (doi:10.3390/fishes8060312), 2023-06-13
Supplement: s1 [file s1]

# Short and Long-Term Effects of Early and Late Weaning on Atlantic Cod, *Gadus morhua*

Velmurugu Puvanendran <sup>1,2,\*</sup> and Øyvind J Hansen <sup>1,2</sup>

<sup>1</sup> Centre for Marine Aquaculture (CMA), Salarøyvegen 979, 9103 Kvaløya, Norway

<sup>2</sup> Nofima AS, Muninbakken 9-13, 9291 Tromsø, Norway

\* Correspondence: velmurugu.puvanendran@Nofima.no; Tel.: +47-77629216

**Table S1.** Detailed feeding table of Atlantic cod larvae from start feeding to end of weaning using late weaning strategy. Rotifer numbers are in million and dry feed amount is in grams.

| Feed Type | Larval Age (dph) | Number of Feeding per Day | Amount per Feeding (million/g) | Amount/day (Million/g) | Notes                                                                                                          |
|-----------|------------------|---------------------------|--------------------------------|------------------------|----------------------------------------------------------------------------------------------------------------|
| Algae     | 2–12             | 3                         |                                | 8                      | 2ml each at 09.00 and 15.00 and 4ml at 22.00.                                                                  |
| Rotifer   | 2–4              | 7                         | 0.61                           | 4.27                   |                                                                                                                |
| Rotifer   | 5–24             | 7                         | 1.05                           | 7.35                   |                                                                                                                |
| Rotifer   | 25–29            | 7                         | 0.76                           | 5.32                   | Overlapping feeding of rotifers and Artemia                                                                    |
| Artemia   | 25–29            | 7                         | 0.17                           | 1.19                   |                                                                                                                |
| Artemia   | 30–37            | 5                         | 0.53                           | 2.65                   |                                                                                                                |
| Artemia   | 38–44            | 5                         | 0.53                           | 2.65                   | Co-feeding of Artemia and dry feed where dry feed is fed 1 hour before Artemia.                                |
| Dry feed  | 38–44            | 6                         | 2                              | 12                     |                                                                                                                |
| Artemia   | 45–48            | 5                         | 0.53                           | 2.65                   | Weaning to dry feed starts. Stage 1. Dry feed is fed every hour from 06.00 to 11.00.                           |
| Dry feed  | 45–48            | 6                         | 2                              | 12                     |                                                                                                                |
| Artemia   | 49–50            | 4                         | 0.53                           | 2.12                   | Stage 2. One Artemia feeding is withdrawn. Dry feed is fed every hour from 06.00 to 11.00 and 18.00–23.00.     |
| Dry feed  | 49–50            | 12                        | 2                              | 24                     |                                                                                                                |
| Artemia   | 51–52            | 3                         | 0.53                           | 1.59                   | Stage 3. Another Artemia feeding is withdrawn. Dry feed is fed every hour from 03.00 to 10.00 and 18.00–23.00. |
| Dry feed  | 51–52            | 14                        | 2                              | 28                     |                                                                                                                |
| Artemia   | 53–54            | 2                         | 0.53                           | 1.06                   | Stage 4. Another Artemia feeding is withdrawn. Dry feed is fed every hour from 06.00 to 17.00 and 22.00–02.00. |
| Dry feed  | 53–54            | 18                        | 2                              | 36                     |                                                                                                                |
| Artemia   | 55–56            | 1                         | 0.53                           | 0.53                   | Stage 5. Another Artemia feeding is withdrawn. Dry feed is fed every hour except for 02.00–03.00.              |
| Dry feed  | 55–56            | 22                        | 2                              | 44                     |                                                                                                                |
| Dry feed  | 57 -             | 12                        | 4.16                           | 50                     | No Artemia feeding. Fully weaned to dry feed.                                                                  |

**Table S2.** Detailed feeding table of Atlantic cod larvae from start feeding to end of weaning using early weaning strategy. Rotifer numbers are in million and dry feed amount is in grams.

| Feed type | Larval age (dph) | Number of feeding per day | Amount per feeding (million/g) | Amount/day (Million/g) | Notes                                                                           |
|-----------|------------------|---------------------------|--------------------------------|------------------------|---------------------------------------------------------------------------------|
| Algae     | 2–12             | 3                         |                                | 8                      | 2ml each at 09.00 and 15.00 and 4ml at 22.00.                                   |
| Rotifer   | 2–4              | 7                         | 0.61                           | 4.27                   |                                                                                 |
| Rotifer   | 5–14             | 7                         | 1.05                           | 7.35                   |                                                                                 |
| Rotifer   | 15–21            | 7                         | 1.05                           | 7.35                   | Co-feeding of Rotifer and dry feed where dry feed is fed 1 hour before Rotifer. |
| Dry feed  | 15–21            | 7                         | 2                              | 14                     |                                                                                 |
| Rotifer   | 22–25            | 5                         | 1.47                           | 7.35                   | Weaning to dry feed starts. Stage 1.                                            |
| Dry feed  | 22–25            | 6                         | 2                              | 12                     | Dry feed is fed every hour from 06.00 to 11.00.                                 |
| Rotifer   | 26–28            | 4                         | 1.47                           | 5.88                   | Stage 2. One Rotifer feeding is withdrawn. Dry feed is fed every                |
| Dry feed  | 26–28            | 12                        | 2                              | 24                     | hour from 06.00 to 11.00 and 18.00–23.00.                                       |
| Rotifer   | 29–31            | 3                         | 1.47                           | 4.41                   | Stage 3. Another Rotifer feeding is withdrawn. Dry feed is fed every            |
| Dry feed  | 29–31            | 14                        | 2                              | 28                     | hour from 03.00 to 10.00 and 18.00–23.00.                                       |
| Rotifer   | 32–33            | 2                         | 1.47                           | 2.94                   | Stage 4. Another Rotifer feeding is withdrawn. Dry feed is fed every            |
| Dry feed  | 32–33            | 18                        | 2                              | 36                     | hour from 06.00 to 17.00 and 22.00–02.00.                                       |
| Rotifer   | 34–35            | 1                         | 1.47                           | 1.47                   | Stage 5. Another Rotifer feeding is withdrawn. Dry feed is fed every            |
| Dry feed  | 34–35            | 22                        | 2                              | 44                     | hour except for 02.00–03.00.                                                    |
| Dry feed  | 36 -             | 12                        | 4.16                           | 50                     | No Rotifer feeding. Fully weaned to dry feed.                                   |
